# Supplementary material for: Mechanical Properties of a Supramolecular Nanocomposite Hydrogel Containing Hydroxyl Groups Enriched Hyper-Branched Polymers
Source: MDPI journal article supplement (doi:10.3390/polym13050805), 2021-03-06
Supplement: s1 [file s1]

# Electronic Supplementary Information:

## Mechanical properties of a supramolecular hydrogel containing hydroxyl groups enriched hyper-branched polymers

Wenjin Xing,<sup>a,b</sup> Amin Jamshidi Ghahfarokhi,<sup>a,b</sup> Chaoming Xie,<sup>c</sup> Sanaz Naghibi,<sup>a,b</sup> Jonathan A. Campbell,<sup>b</sup> and Youhong Tang<sup>\*a,b</sup>

According to Table S1, for the same mass of hyper-branched polymers, the hydroxyl content ratio between the three generations is 1 : 0.97 : 0.96, indicating almost the same -OH content per mass.

**Table S1:** Details for HBP molecules of different generations.

| Generation | Formula                                            | Molecular weight<br>(g/mol) | No. of -OH per mass<br>(x10 <sup>-3</sup> mol) |
|------------|----------------------------------------------------|-----------------------------|------------------------------------------------|
| 2          | C <sub>75</sub> H <sub>128</sub> O <sub>45</sub>   | 1749.8                      | 9.1                                            |
| 3          | C <sub>155</sub> H <sub>256</sub> O <sub>93</sub>  | 3607.6                      | 8.9                                            |
| 4          | C <sub>315</sub> H <sub>512</sub> O <sub>189</sub> | 7323.3                      | 8.7                                            |

For an incompressible soft material, in three dimensions, the Neo-Hookean model can be expressed as ([Holzapfel, 2000](#))

$$\widetilde{W} = \frac{\mu}{2}(\lambda_1^2 + \lambda_2^2 + \lambda_3^2 - 3) \quad (1)$$

where  $\widetilde{W}$  denotes the strain energy density,  $\mu$  is the shear modulus, and  $\lambda_i$  the  $i$ -th principle stretch ( $i=1,2,3$ ).

<sup>a</sup> College of Science and Engineering, Flinders University, Clovelly Park, Adelaide, SA 5042, Australia

<sup>b</sup> Institute for NanoScale Science and Technology, Flinders University, Bedford Park, Adelaide, SA 5042, Australia

<sup>c</sup> Key Lab of Advanced Technologies of Materials, Ministry of Education, School of Materials Science and Engineering, Southwest Jiaotong University, Chengdu, Sichuan, 610031, China

In three dimensions, the Mooney-Rivlin incompressible model can be expressed as (Holzapfel, 2000)

$$\widetilde{W} = C_1(\lambda_1^2 + \lambda_2^2 + \lambda_3^2 - 3) + C_2(\lambda_1^{-2} + \lambda_2^{-2} + \lambda_3^{-2} - 3) \quad (2)$$

where the shear modulus  $\mu$  can be computed as  $\mu = 2(C_1 + C_2)$ . Note that the Neo-Hookean material can be regarded as a special case of the Mooney-Rivlin model, when  $C_2 = 0$ .

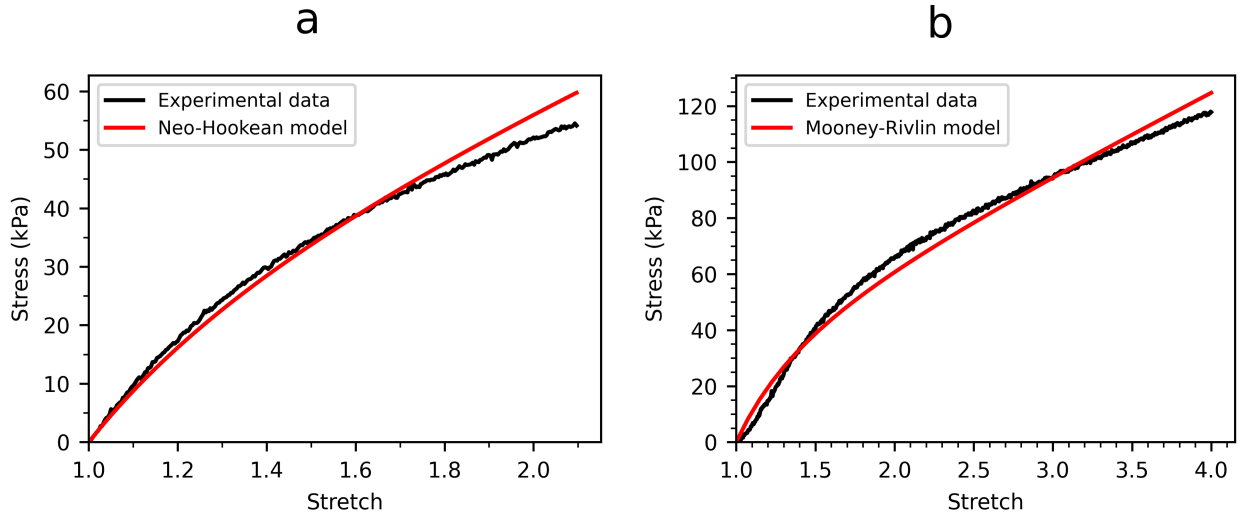

**Figure S1:** Stress-stretch curves of the PAA hydrogel (a), and hybrid hydrogel of PAH3\_14 (b), measured from experiments and fitted with the Neo-Hookean, and Mooney-Rivlin models in Abaqus, respectively. For the PAA and hybrid hydrogels, the initial shear modulus obtained from fitting was 31.96 kPa, and 40.63 kPa, respectively.

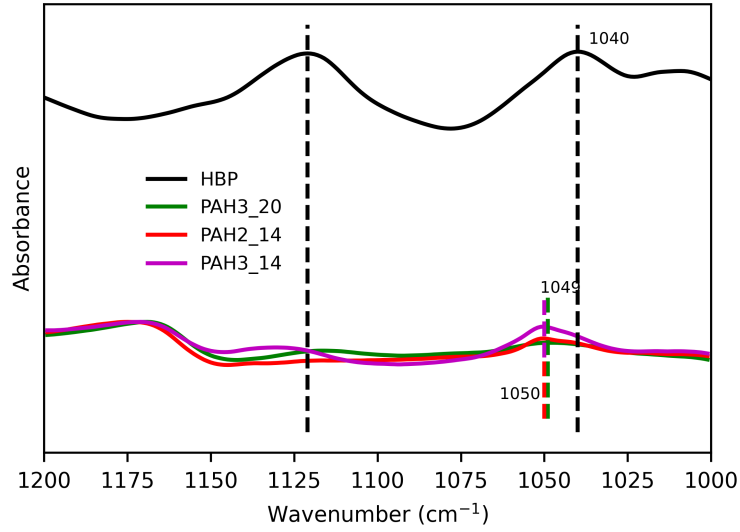

**Figure S2:** Normalised FTIR spectra for HBP powder, PAH2\_14, PAH3\_14, and PAH3\_20, in the range of 1000-1200  $\text{cm}^{-1}$ . The blue shift confirmed the formation of hydrogen bonding in the hybrid hydrogels with the second and third generations of HBP ([Hobza and Havlas, 2000](#)). However, by careful inspection, the peak for the second generation was a little narrower than the other two cases, likely suggesting hydrogen bonding was not as much as that corresponding to the third generation.

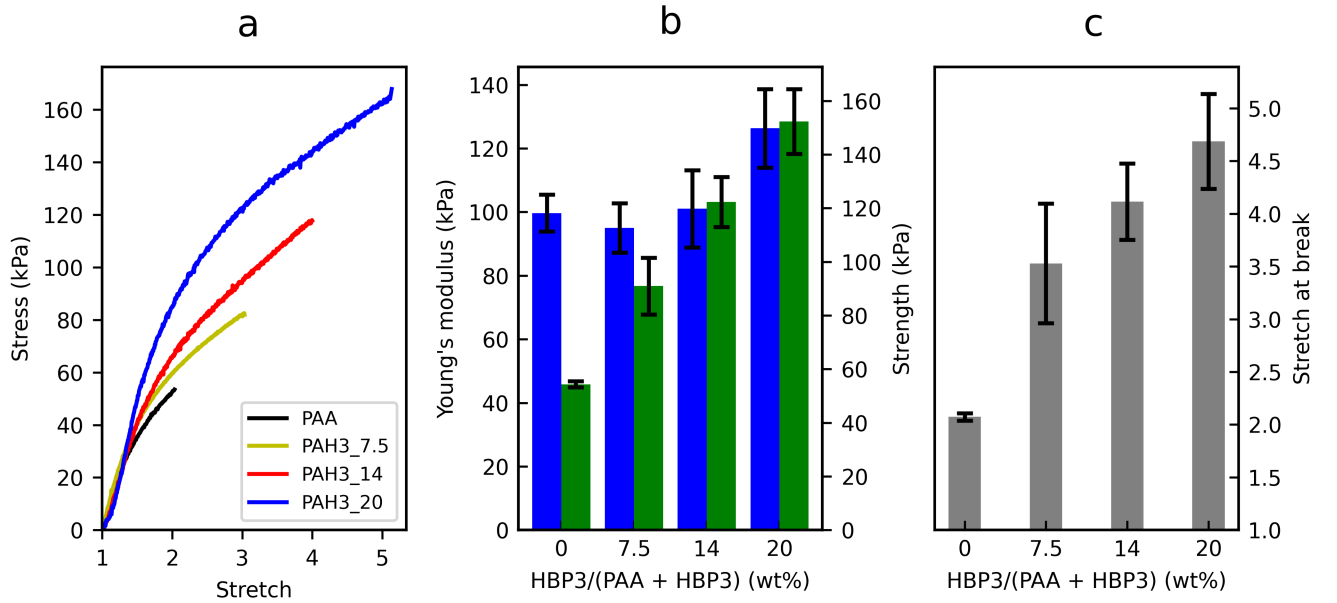

**Figure S3:** Mechanical behaviour of PAA hydrogels with and without adding HBPs, in uniaxial tension. Effects of varying the HBP3 content were explored. a, Typical nominal stress-stretch curves. b, Young's modulus and tensile strength. c, Stretch at break. Error bars show the standard derivation (SD); sample size,  $n = 3$  per experiment.

## References

- [1] Hobza, P. and Havlas, Z. (2000). Blue-shifting hydrogen bonds. *Chemical reviews*, 100(11):4253–4264.
- [2] Holzapfel, A. G. (2000). Nonlinear solid mechanics: a continuum approach for engineering.
